# Supplementary material for: Kinetics of the heterogeneous conversion of 1,4-hydroxycarbonyls to cyclic hemiacetals and dihydrofurans on organic aerosol particles
Source: Royal Society of Chemistry journal article supplement (doi:10.1039/b904333k), 2009-01-01
Supplement: b904333k.pdf [file b904333k.pdf]

## **Electronic Supplementary Information**

### **Kinetics of the Heterogeneous Conversion of 1,4-Hydroxycarbonyls to Cyclic Hemiacetals and Dihydrofurans on Organic Aerosol Particles**

Yong Bin Lim and Paul J. Ziemann

*Air Pollution Research Center*

*University of California, Riverside, California 92521*

```
* * Generated by FACSIMILE Reaction Wizard -  
27 March 2008 ;  
*===== ;  
* C14 1hr Dry ;  
*===== ;
```

```
EXECUTE OPEN 8 "C:\CHA model\C14_sample.out";
```

```
PARAMETER
```

```
K1f K2f K3f K4f K5f 0.001 K6f 0.04 K7f K8f K9f K10f 1.7e-3;
```

```
VARIABLE
```

```
Alk CHAp DHFg DHFp HCg Palk Pdhf  
Phc;
```

```
COMPILE INSTANT;
```

```
Alk = 1 ;  
**;
```

```
COMPILE GENERAL;
```

```
K1f = 0.5*16.8e-12*3.15e8*(TIME+0.1)^-0.36275 ;  
K2f = 0.5*16.8e-12*3.15e8*(TIME+0.1)^-0.36275 ;  
K3f = 24.6e-12*3.15e8*(TIME+0.1)^-0.36275 ;  
K4f = 0.5*4.13e3*1e-6*(500-436*exp(-TIME/910)) ;  
K7f = 186*(0.129+0.179*exp(-TIME/420)) ;  
K8f = 4.35e3*1e-6*(500-436*exp(-TIME/910)) ;  
K9f = 2.18e-10*3.15e8*(TIME+0.1)^-0.36275 ;  
**;
```

```
COMPILE EQUATIONS ;
```

```
% K1f : Alk = Palk;  
% K2f : Alk = HCg;  
% K3f : HCg = Phc;  
% K4f : HCg = CHAp;  
% K5f : CHAp = DHFp;  
% K6f : DHFp = CHAp;  
% K7f : DHFp = DHFg;  
% K8f : DHFg = DHFp;  
% K9f : DHFg = Pdhf;  
% K10f : HCg = DHFg;  
**;
```

```
SETPSTREAM 1 8 ;
```

```
TIME ;  
Alk CHAp DHFg DHFp HCg Palk Pdhf ;  
Phc ;  
**;
```

```
COMPILE OUT ;
```

```
PSTREAM 1 ;  
**;
```

```
WHENEVER
```

```
TIME= 67 * (+54.686) 0 %  
CALL OUT;  
**;
```

```
BEGIN;  
STOP;
```

**Table S1.** Rate constants for reactions of alkanes and 1, 4-HC with OH radicals, calculated using a structure-reactivity method.

| compound<br>carbon number | $k_{\text{Alk-OH}}^1$<br>( $10^{-12} \text{ cm}^3 \text{ molecule}^{-1} \text{ s}^{-1}$ ) | $k_{\text{OH-HC}}^{1,2}$<br>( $10^{-12} \text{ cm}^3 \text{ molecule}^{-1} \text{ s}^{-1}$ ) |
|---------------------------|-------------------------------------------------------------------------------------------|----------------------------------------------------------------------------------------------|
| 11                        | 12.5                                                                                      | 20.4                                                                                         |
| 12                        | 13.9                                                                                      | 21.8                                                                                         |
| 13                        | 15.3                                                                                      | 23.2                                                                                         |
| 14                        | 16.8                                                                                      | 24.6                                                                                         |
| 15                        | 18.2                                                                                      | 26.0                                                                                         |
| 16                        | 19.6                                                                                      | 27.4                                                                                         |
| 17                        | 21.0                                                                                      | 28.9                                                                                         |

<sup>1</sup>E. S. C. Kwok and R. Atkinson, *Atmos. Environ.* 1995, **29**, 1685-1695.

<sup>2</sup>H. L. Bethel, R. Atkinson and J. Arey, *Int. J. Chem. Kinet.* 2001, **33**, 310-316.

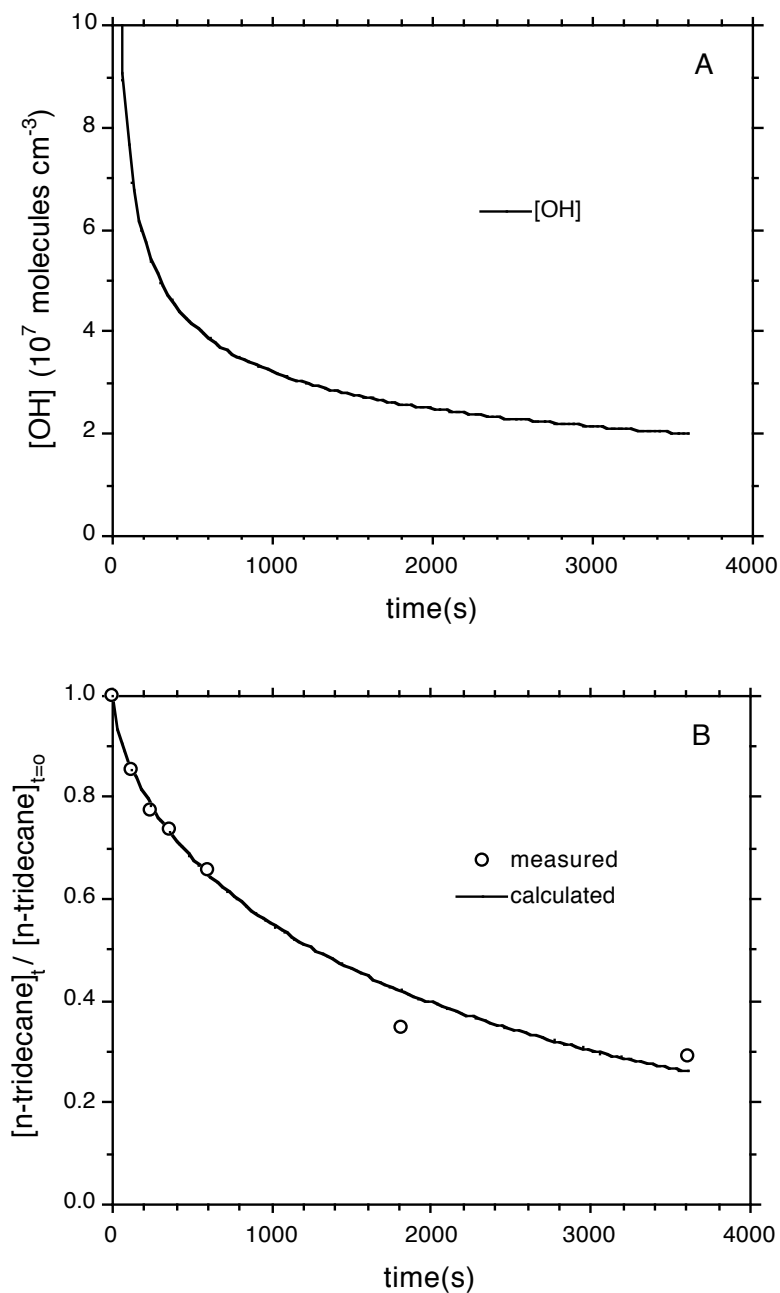

**Fig. S1.** Plots of (A)  $[\text{OH}_g]$  time profile determined from concentrations of *n*-tridecane measured during the environmental chamber reaction with OH radicals and (B) measured concentrations *n*-tridecane profile and curve calculated using the equation for  $[\text{OH}_g]$ ,  $k_{\text{Alk-OH}}$ , and eqn (1) in the text.

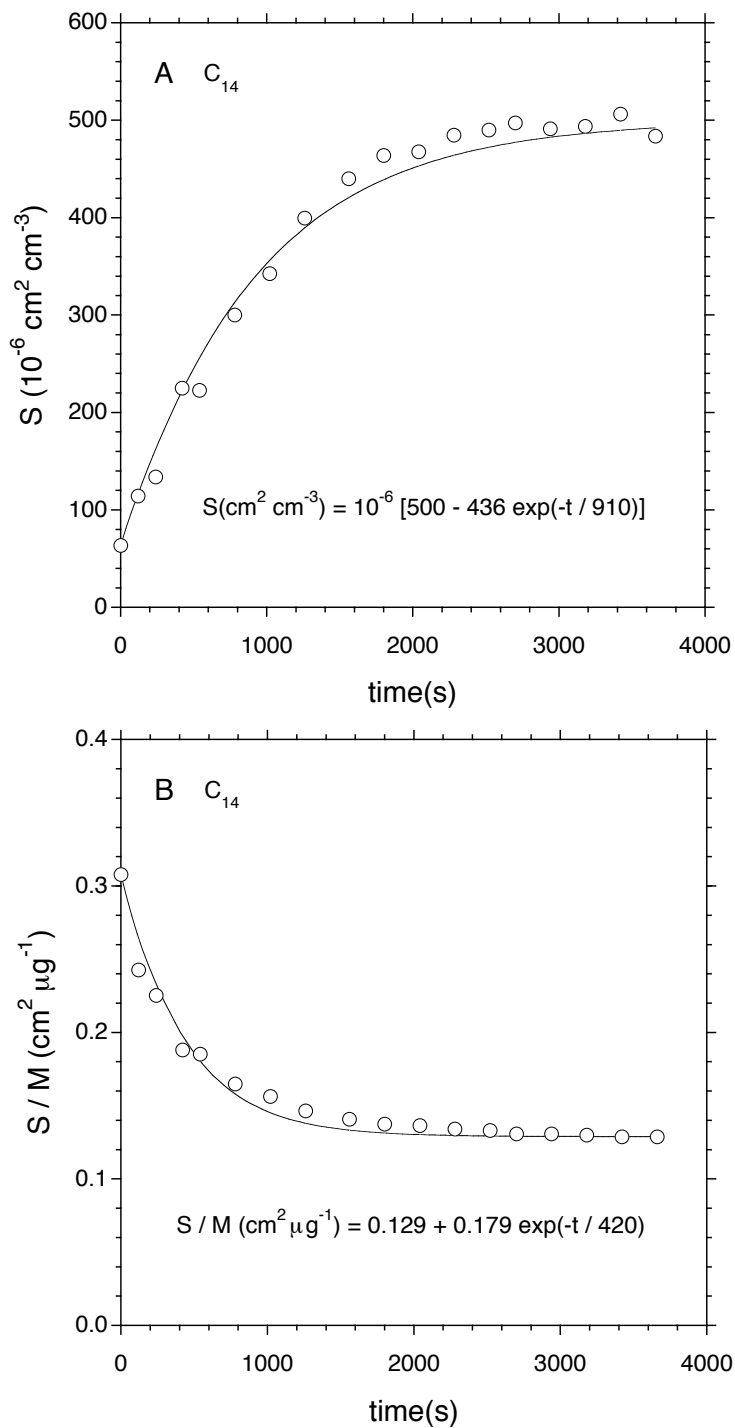

**Fig. S2.** (A) Surface area and (B) surface area/mass concentrations measured for the reaction of the  $C_{14}$  alkane in the presence  $\text{NO}_x$  in air at  $<1\%$  RH and curves fit to the data.
